# Supplementary material
Source: PubMed Central journal article supplement (PMC4415018)
Supplement: supp_fj.14-259531_Supplemental_Figure1.pdf [file supp_fj.14-259531_Supplemental_Figure1.pdf]

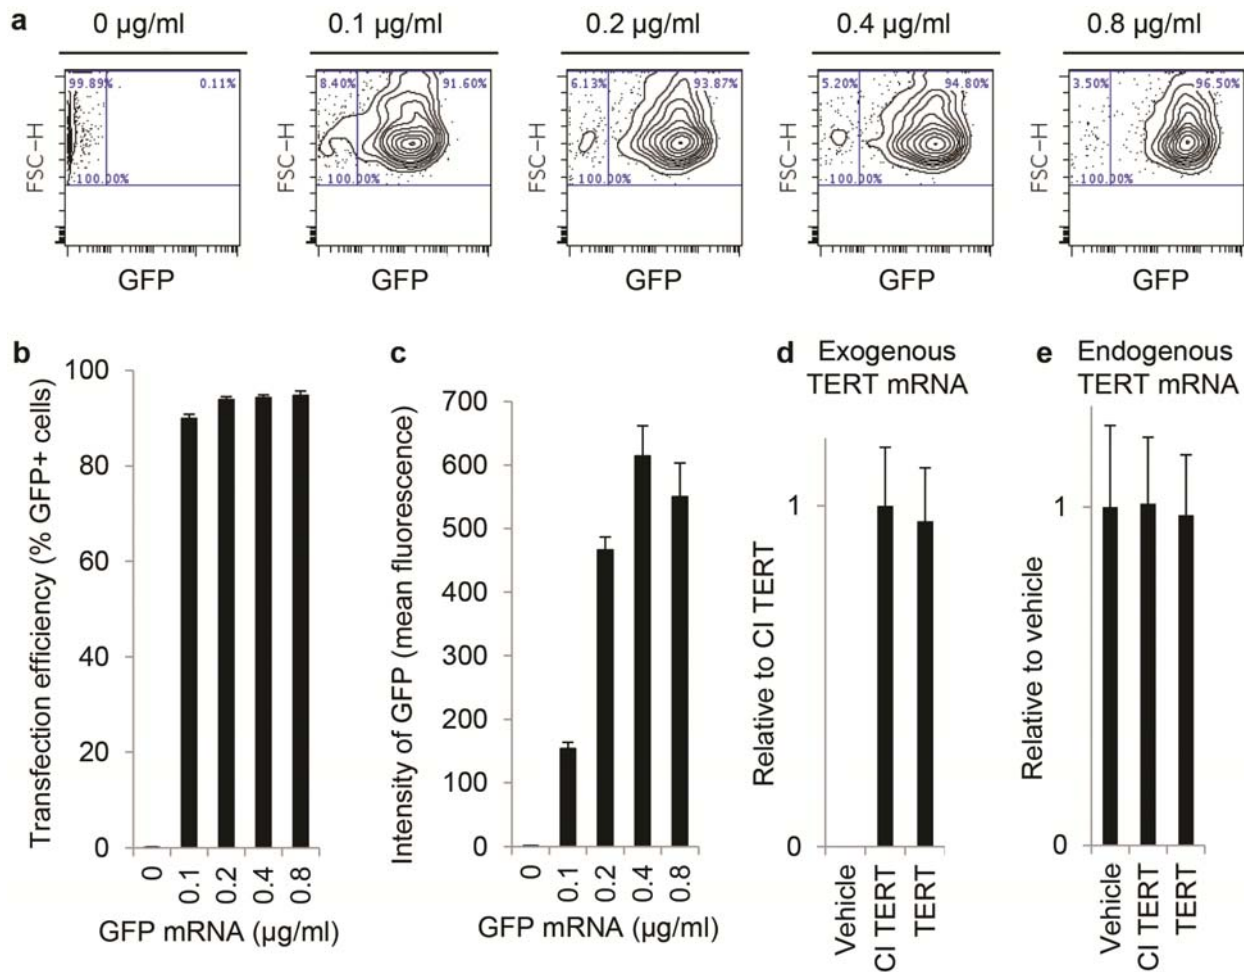

**Supplemental Figure S1.** Transfection efficiency. **(a,b)** The proportion of GFP fluorescent myoblasts was measured by flow cytometry 24 h after start of transfection with 0.1–0.8 µg/ml of modified mRNA encoding GFP (n=2000). **(c)** Mean fluorescence of modified GFP mRNA-transfected myoblasts increased in response to increasing doses. **(d)** Quantification of exogenous TERT mRNA in fibroblasts 24 h after transfection with 1 µg/ml of TERT or CI TERT mRNA, as measured using RT-qPCR. Ratio of TERT to CI TERT was calculated using the Pfaffl method with RPL37A and GAPDH as reference genes (n=3). **(e)** Quantification of endogenous TERT mRNA in fibroblasts 24 h after transfection with 1 µg/ml of TERT or CI TERT mRNA, as measured using qPCR, calculated as in (d). All data are presented as means ± s.e.m.
