# Supplementary material
Source: PubMed Central journal article supplement (PMC4415018)
Supplement: supp_fj.14-259531_Supplemental_Figure3.pdf [file supp_fj.14-259531_Supplemental_Figure3.pdf]

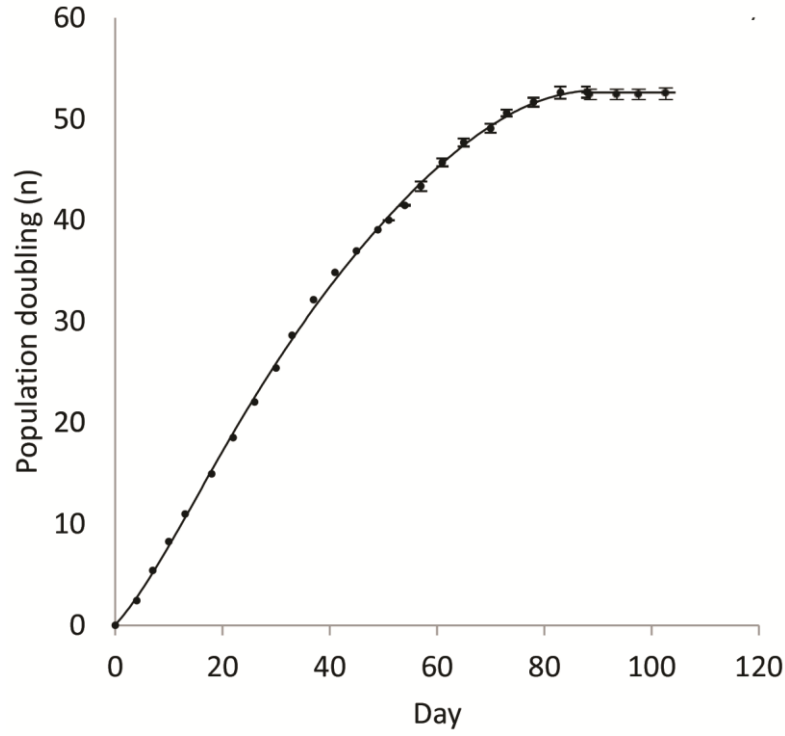

**Supplemental Figure S3.** Growth curve of untreated MRC5 fibroblasts. Fibroblasts were received from ATCC at passage 14 and counted using a hemocytometer at each passage until senescence.
