# Supplementary material
Source: PubMed Central journal article supplement (PMC4415018)
Supplement: supp_fj.14-259531_Supplemental_Figure4.pdf [file supp_fj.14-259531_Supplemental_Figure4.pdf]

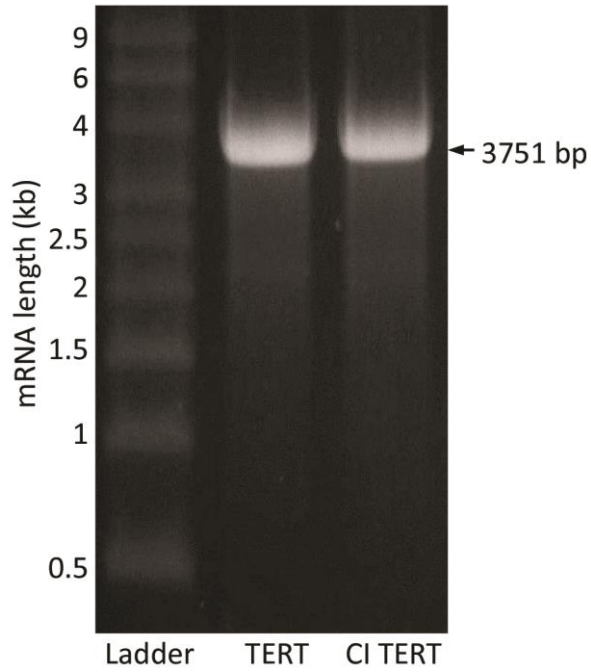

**Supplemental Figure S4.** Denaturing agarose electrophoresis gel of TERT and CI TERT nucleoside-modified mRNA. The 3751 bp total length of each construct included the 3399 bp open reading frame of hTERT (NCBI CCDS3861.2), the 5' and 3' UTRs of HBB, and 151 nt poly-A tail.
